# Supplementary material for: Andesitic Magmatism on a Differentiated Asteroid
Source: Research Square preprint supplement (doi:10.21203/rs.3.rs-231610/v1), 2021-04-13
Supplement: Supplementary file 1 [file c8d39766e7e47e8e7cea8fb6.xlsx]

## Sheet: Pyroxene
			23Na	25Mg	27Al	43Ca	45Sc	48Ti	51V	57Fe	59Co	71Ga	85Rb	88Sr	89Y	90Zr	93Nb	133Cs	137Ba	139La	140Ce	141Pr	146Nd	147Sm	153Eu	157Gd	159Tb	163Dy	165Ho	166Er	169Tm	172Yb	175Lu	178Hf	181Ta	208Pb	232Th	238U	Nb/Ta	Zr/Hf
7	EC 002 Pyx 1		3360.13	71799.8	4918.97	118325	74.2618	1844.96	259.285	98739.7	1.44015	0.631038		4.39155	8.39586	4.26026	0.135529			0.768092	2.547	0.433138	1.93243	0.866787		1.16196	0.216343	1.58525	0.321473	0.923326	0.114502	0.808434	0.119643	0.119366						35.6907
8	EC 002 Pyx 2		2627.77	72313.2	3101.65	87509.8	53.2856	2118.85	227.692	147131	1.54027	0.670297		5.39635	13.4413	11.8682	1.27907		2.07189	0.928992	3.3587	0.543894	3.2582	1.11022		1.6012	0.338041	2.32992	0.518123	1.53899	0.21458	1.63954	0.248568	0.153958			0.164344	0.0666699		77.087
9	EC 002 Pyx 3		7252.83	70998.7	9375.24	85260.6	62.3046	2631.87	200.707	133762	2.32547	1.02612	1.63256	28.1134	11.2389	15.7255	0.485517		117.399	1.00227	3.38592	0.700506	2.91994	1.38538		1.48007	0.254988	1.97592	0.469247	1.42075	0.183891	1.40035	0.201944	0.440709			0.0834262			35.6823
10	EC 002 Pyx 4		3124.09	74215.5	4646.22	98622.9	66.1751	1896.01	194.029	136967	1.90459	0.703737		4.4121	14.1917	5.98647	0.330777		1.49618	1.26118	4.36288	0.81709	3.69312	1.24478	0.0828032	1.70443	0.365333	2.72393	0.496376	1.60804	0.26427	1.49117	0.22446				0.0664764
11	EC 002 Pyx 5		2398.89	77539.9	2693.26	77631.9	49.3455	2133.52	234.962	157800	1.85991	0.703876		2.14264	11.1301	20.0622	1.35183			0.834464	2.99432	0.559231	2.9575	1.10928		1.40592	0.258825	2.1624	0.407842	1.32359	0.231505	1.45127	0.196429	0.26713	0.0295436	0.105414	0.151619	0.0275679	45.757	75.1025
12	EC 002 Pyx 6		3558.85	69327.8	3837.35	106900	70.2014	2917.75	146.043	127701	1.44559	0.72533		3.54987	15.5771	12.0078	1.23435			1.5755	5.33881	0.863949	4.49747	1.57047		2.03623	0.46817	2.82327	0.683871	2.09355	0.272693	1.78189	0.266972	0.259149			0.122115	0.05648		46.3354
13	EC 002 Pyx 7		3399.81	69884.4	3669.13	107975	66.8155	2784.87	225.05	136943	1.72881	0.775633		3.61769	16.5413	14.592	0.788066			1.53612	5.16937	0.843501	4.59206	1.47653		2.43151	0.38459	2.90812	0.635934	1.91711	0.284321	1.91368	0.268657	0.263596	0.0365105		0.146475	0.0592504	21.5846	55.3575
15	EC 002 Pyx 9		3287.48	73896.5	4163.65	101397	62.8105	2419	240.565	142887	2.03108	0.801686	1.69795	6.66715	16.4248	13.2077	1.82797	0.143999	13.691	0.998882	3.97777	0.716817	3.61597	1.39735		2.35078	0.389288	2.78973	0.660036	1.8001	0.265639	1.86987	0.266223	0.199223	0.0470174	0.107127	0.216837	0.0689193	38.8786	66.2963
16	EC 002 Pyx 10		3679.5	76223.3	6482.2	104019	63.905	1594.14	279.941	136453	1.56224	0.581386	0.699894	4.08744	12.3944	4.87838	0.890176		0	0.900033	3.43768	0.553367	2.9054	1.07675		1.47951	0.288693	1.95262	0.493925	1.37071	0.237062	1.40504	0.216742				0.115725	0.058703
17	EC 002 Pyx 11		3239.59	75964	3858.8	98569.7	60.0095	2837.88	226.463	148361	1.96014	0.637736		4.53646	16.598	18.4563	1.80383		1.59266	1.09592	4.0065	0.711014	3.85844	1.49105		2.1862	0.397958	2.97003	0.691255	2.0454	0.333408	2.04933	0.306345	0.323623		0.137657	0.247347	0.0679353		57.0301
18	EC 002 Pyx 12		4344.34	74166.7	4725.94	100094	59.9421	2749.12	227.943	147507	1.82569	0.854435	0.272171	15.0344	16.8583	21.8989	4.02094			1.31204	4.38863	0.826278	4.17234	1.11857		2.25228	0.394669	3.19203	0.659761	2.05874	0.264002	2.19429	0.319417	0.194132	0.0974249		0.561976	0.38752	41.2722	112.804
21	EC 002 Pyx 13		3147.64	72283.7	3391.16	104551	61.2866	2404.49	214.741	135353	1.57548	0.677857		2.87433	11.8703	18.9897	0.468229			1.08259	3.50772	0.626334	3.70683	1.28095		1.56022	0.305507	2.19008	0.471852	1.49865	0.21518	1.48618	0.188617	0.316268			0.0301216			60.043
22	EC 002 Pyx 14		3607.78	72176.5	4293.16	104143	62.1022	2160.52	235.606	134617	1.73189	0.753133		3.49499	13.5781	13.3263	1.43785			1.10643	4.31744	0.795013	3.60057	1.40093	0.0752469	1.60684	0.349689	2.5168	0.511484	1.44663	0.230147	1.4868	0.219385	0.17803	0.0351791		0.196258	0.0364739	40.8722	74.854
23	EC 002 Pyx 15		2713.81	79902.8	3044.04	84288.7	50.9501	2142.62	237.039	155726	2.32137	0.684081		2.58731	12.0694	15.6934	1.53977			0.844674	2.9611	0.498515	3.06847	1.14799		1.29668	0.276634	1.95495	0.45675	1.54746	0.209582	1.30852	0.215832	0.193051		0.131689	0.24279	0.051659		81.2915
24	EC 002 Pyx 16		2785.65	104079	3689.88	116264	56.3425	1185.56	280.148	74731.2	1.81513	0.35715		2.79947	2.56939	0.495437				0.0784899	0.200711					0.368277	0.0573955	0.408851	0.124488	0.281386	0.041403	0.319026	0.039203
26	EC 002 Pyx 18		7919.72	72057.2	9449.75	82512	50.5744	4556.33	145.291	154273	1.66334	1.37364	2.56273	9.31922	12.0162	33.9554	3.76958	0.209914	3.57715	0.907489	2.93652	0.573701	2.76745	1.13056	0.0884617	1.69068	0.315635	2.04609	0.465229	1.48795	0.207706	1.40206	0.212823	0.755132	0.128906	0.189278	0.36196	0.0983816	29.2429	44.9662
27	EC 002 Pyx 19		2175.09	86181.2	2690.33	57515.9	41.5552	2314.16	156.146	189997	2.16048	0.6254	28.542	2.35374	9.41876	19.1529	4.16868	2.23699	2.18502	0.568851	2.04042	0.34824	2.04453	0.790089		1.03892	0.240337	1.46271	0.357242	1.31163	0.18502	1.30233	0.172976	0.318672	0.124573	0.218936	0.492183	0.109958	33.4639	60.1024
28	EC 002 Pyx 20		3101.54	79664.9	3589	116490	63.7412	1513.55	235.34	133281	1.5382	0.472478		3.64196	12.7486	4.72909	0.7007			1.18235	4.00514	0.715624	3.11423	1.36648		1.74216	0.335453	2.14283	0.447134	1.45014	0.214423	1.38403	0.232634				0.0541751
29	EC 002 Pyx 21		3157.79	78554.1	3850.62	100033	62.3578	2071.15	261.143	149803	1.84662	0.683385		2.95862	16.0885	9.68895	0.731969			0.993477	4.07734	0.699863	3.70054	1.55233		1.95516	0.382773	2.63323	0.61237	2.04016	0.27264	1.92301	0.254893	0.148289			0.0771547			65.3382
30	EC 002 Pyx 22		3995.74	72943.9	4870.05	100450	57.9435	2858.41	226.058	140688	1.76958	0.712751	1.19847	3.78568	14.5425	15.5164	3.54576		2.23418	1.04106	3.64731	0.679922	3.51768	1.40673		2.0677	0.371003	2.49457	0.558898	1.65418	0.291465	1.95206	0.27678	0.237792	0.0699362		0.176091	0.0932273	50.7	65.2518
31	EC 002 Pyx 23		3658.21	77535.8	5023.36	115393	75.0391	2137.8	194.439	133589	1.60059	0.806017		3.91737	15.8205	8.21607	0.63327			1.15822	4.27635	0.701677	3.99884	1.33301		2.05202	0.358557	2.73396	0.556259	2.05671	0.291446	1.73818	0.274513	0.149871			0.062982	0.0449887		54.821
32	EC 002 Pyx 24		3977.71	74579	4407.5	86047.4	50.2444	3094.65	212.657	159732	1.53417	0.835072	0.526213	3.99416	12.1742	21.7148	5.71042		0.64998	0.894497	3.26732	0.510998	3.25431	1.32352		1.8558	0.318146	2.04501	0.505714	1.56843	0.21045	1.633	0.2191	0.242743	0.123009		0.589612	0.175594	46.4227	89.4559
33	EC 002 Pyx 25		3075.8	78439.9	3120.42	113670	48.5925	1375.41	311.096	131797	1.78034	0.613735		3.29164	12.5902	4.69939	0.927694			1.1254	3.91776	0.675281	3.96347	1.23197		1.68275	0.310184	2.14612	0.481611	1.24139	0.214424	1.56486	0.239774				0.0748392
			23Na	25Mg	27Al	43Ca	45Sc	48Ti	51V	57Fe	59Co	71Ga	85Rb	88Sr	89Y	90Zr	93Nb	133Cs	137Ba	139La	140Ce	141Pr	146Nd	147Sm	153Eu	157Gd	159Tb	163Dy	165Ho	166Er	169Tm	172Yb	175Lu	178Hf	181Ta	208Pb	232Th	238U	Nb/Ta	Zr/Hf
		Average	3672.91	75029.5	4509.17	97790.9	59.702	2388.96	222.374	142414	1.77936	0.743128	4.6415	5.644	13.4413	14.0285	1.71736	0.863633	14.4897	1.05084	3.72373	0.654271	3.41544	1.26417	0.0821706	1.75632	0.332764	2.35362	0.521017	1.60926	0.236743	1.59936	0.23376	0.264485	0.0769	0.14835	0.201643	0.0935552	38.6882	64.3061
		2SD	2740.51	7968.13	3639.94	29346.6	17.29	1354.27	79.9474	33632.7	0.516968	0.360332	19.3714	11.4935	4.8066	14.5604	3.03493	2.37963	72.7326	0.469317	1.58173	0.276077	1.3641	0.410191	0.0132601	0.756509	0.122493	0.914985	0.204139	0.632981	0.0948368	0.62247	0.0904105	0.292585	0.0839067	0.0920533	0.331671	0.178018	18.3657	38.3915
		RSD	74.6141	10.62	80.7229	30.0095	28.9605	56.6886	35.9517	23.6161	29.0535	48.4886	417.353	203.64	35.7599	103.792	176.721	275.537	501.959	44.661	42.477	42.1962	39.9392	32.4474	16.1373	43.0735	36.8108	38.8757	39.1808	39.3338	40.0589	38.92	38.6766	110.624	109.112	62.0513	164.484	190.281	47.471	59.7012
		Max	7919.72	86181.2	9449.75	118325	75.0391	4556.33	311.096	189997	2.32547	1.37364	28.542	28.1134	16.8583	33.9554	5.71042	2.23699	117.399	1.5755	5.33881	0.863949	4.59206	1.57047	0.0884617	2.43151	0.46817	3.19203	0.691255	2.09355	0.333408	2.19429	0.319417	0.755132	0.128906	0.218936	0.589612	0.38752	50.7	112.804
		Min	2175.09	69327.8	2690.33	57515.9	41.5552	1375.41	145.291	98739.7	1.44015	0.472478	0.272171	2.14264	8.39586	4.26026	0.135529	0.143999	0	0.568851	2.04042	0.34824	1.93243	0.790089	0.0752469	1.03892	0.216343	1.46271	0.321473	0.923326	0.114502	0.808434	0.119643	0.119366	0.0295436	0.105414	0.0301216	0.0275679	21.5846	35.6823
		N	22	22	22	22	22	22	22	22	22	22	8	22	22	22	22	3	10	22	22	22	22	22	3	22	22	22	22	22	22	22	22	18	9	6	21	15	9	18

## Sheet: Pyx Transects
			23Na	25Mg	27Al	29Si	43Ca	45Sc	48Ti	51V	57Fe	59Co	71Ga	88Sr	89Y	90Zr	93Nb	137Ba	139La	140Ce	141Pr	146Nd	147Sm	157Gd	159Tb	163Dy	165Ho	166Er	169Tm	172Yb	175Lu	178Hf	232Th
8	EC 002 Vert 1		866.793	108230	1729.29	247775	23955.4	20.5677	823.461	124.251	215292	3.6038		1.16989	3.56258	2.85828	0.652696	2.19938		0.277704								0.629846		0.709737			0.381104
9	EC 002 Vert 2		973.259	149294	1734.82	247775	24970.3	18.8662	386.014	125.102	109879	7.29455		0.378301	0.61754
10	EC 002 Vert 3		1140.3	156727	1608.25	247775	26034	20.2404	402.351	155.282	90936.1	8.153			0.493755
11	EC 002 Vert 4		1150.52	153910	1863.63	247775	24046.5	19.9683	382.34	128.941	93227.9	8.82703		0.598955	0.578275
12	EC 002 Vert 5		1012.48	128466	1446.97	247775	23381.7	22.0545	557.422	124.078	171435	5.71806		0.323797	2.73549	0.976246										0.551948	0.181228	0.428861
13	EC 002 Vert 6		925.433	119663	1652.93	247775	21867.3	21.8009	640.104	121.495	182773	4.336			3.13041	1.26513											0.177591	0.366651
14	EC 002 Hor 1		3610.94	82227.4	2791.83	238706	106901	67.2211	4286.76	188.293	127835		0.857914	3.51265	15.8541	45.598	1.93237		1.04601	3.85011	0.688493	3.3978	1.55982	1.42917	0.471623	2.89346	0.623766	1.77618	0.223913	1.77071	0.274385	1.38776	0.182555
15	EC 002 Hor 2		1064.84	133273	1755.54	247775	21241.2	20.81	472.595	116.874	155766	4.77744			2.2549
16	EC 002 Hor 3		1175.29	151592	1849.79	247775	24624.2	18.0632	388.331	136.62	105323	7.69333		0.532228	0.606934
17	EC 002 Hor 4		1273.83	150838	2210.14	247775	25376.7	21.1819	405.947	134.478	106424	8.51401		0.52295	1.25138	0.54208
18	EC 002 Hor 5		1100.87	144951	1976.16	247775	25482.8	20.3044	441.326	127.444	126053	6.71725		0.449469	2.08825	0.823929
19	EC 002 Hor 6		862.708	111253	1196.38	247775	21635.6	25.1307	899.953	101.308	208735	3.32329	0.599502		4.14141	2.16674											0.14092
		Average	1049.67	137109	1729.44		23874.2	20.8171	527.259	126.898	142349	6.26889	0.599502	0.567941	1.95099	1.43874	0.652696	2.19938		0.277704						0.551948	0.16658	0.47512		0.709737			0.381104
		2SD	267.074	35618.3	532.777		3318.1	3.68821	369.445	26.569	92575.5	4.02292	#DIV/0!	0.563447	2.65291	1.78239	#DIV/0!	#DIV/0!		#DIV/0!						#DIV/0!	0.044592	0.27512		#DIV/0!			#DIV/0!
		RSD	25.4437	25.9781	30.8063		13.8983	17.7172	70.069	20.9373	65.034	64.1728	#DIV/0!	99.2086	135.977	123.886	#DIV/0!	#DIV/0!		#DIV/0!						#DIV/0!	26.7692	57.9053		#DIV/0!			#DIV/0!
		Max	1273.83	156727	2210.14		26034	25.1307	899.953	155.282	215292	8.82703	0.599502	1.16989	4.14141	2.85828	0.652696	2.19938		0.277704						0.551948	0.181228	0.629846		0.709737			0.381104
		Min	862.708	108230	1196.38		21241.2	18.0632	382.34	101.308	90936.1	3.32329	0.599502	0.323797	0.493755	0.54208	0.652696	2.19938		0.277704						0.551948	0.14092	0.366651		0.709737			0.381104
		N	11	11	11		11	11	11	11	11	11	1	7	11	6	1	1		1						1	3	3		1			1

## Sheet: Feldspar
			25Mg	27Al	29Si	43Ca	45Sc	48Ti	57Fe	71Ga	85Rb	88Sr	137Ba	140Ce	153Eu
7	EC 002 Fel 1			131544	335177	29532.8		326.496		5.16007	7.59447	129.463	32.8585
8	EC 002 Fel 2			141570	348622	39615.7		353.758		6.99179	10.1798	152.11	48.8322
9	EC 002 Fel 3			113885	331715	19416.5	13.3701	341.247		4.04823	16.0124	113.607	28.9877
10	EC 002 Fel 4			100006	306102		16.3416	370.843		7.39316	27.8727	68.0397	28.7078
11	EC 002 Fel 5			119691	308754	24348.5		353.441		4.84292	10.5155	127.838	29.1151
12	EC 002 Fel 6		44.0566	104353	292856	11639.6				7.0781	23.6091	79.8782	32.9203
13	EC 002 Fel 7			118050	312971	21764.1		351.995		4.91997	11.8307	119.292	37.7568
14	EC 002 Fel 8			108671	304590	17435.9		378.644		5.52471	16.0833	89.3751	32.9203
15	EC 002 Fel 9			115644	332700	9928.12		471.549		6.3454	22.3917	85.4281	30.8536
16	EC 002 Fel 10			118466	328705	23661.9		349.037		4.80254	11.4584	118.488	27.5811
17	EC 002 Fel 11		36.1983	114996	336302	15091.6		303.925		6.30024	16.0034	96.6759	33.8411
18	EC 002 Fel 12			120195	307338	18146.2		398.161		5.99581	17.3843	104.379	37.1648
21	EC 002 Fel 13			94473.7	196782	16819.3		378.781		4.08819	12.5609	95.6703	27.8228
22	EC 002 Fel 14			77238.7	274900			335.495		8.38161	28.8058	60.6375	28.338
23	EC 002 Fel 15			114979	332288	25649.9		412.529		4.40479	14.6493	131.072	39.6695		1.17583
24	EC 002 Fel 16			120562	324207	28246.2		368.749			8.68681	138.875	34.6441	0.735021
25	EC 002 Fel 17			109991	324574	20272.7		355.886		6.24625	13.5925	102.931	28.5952	0.503766
27	EC 002 Fel 19			110299	312890	19052.5		352.677		5.4373	15.4247	105.287	35.5898
28	EC 002 Fel 20			119200	324435	27140.3		367.709		4.76098	9.50047	130.14	39.246		0.733217
29	EC 002 Fel 21			96834.8	273652	15699		401.148		5.9177	17.5576	94.307	29.0936
30	EC 002 Fel 22			133854	335171	29798.8		385.824		4.79963	7.92789	164.541	43.4813	1.26998
31	EC 002 Fel 23			104824	319064	18500.7		396.306		6.4456	12.5068	111.277	26.1377
32	EC 002 Fel 24			104464	308637	14419.9		347.608	1190.18	5.38796	18.4508	94.7838	37.623
			25Mg	27Al	29Si	43Ca	45Sc	48Ti	57Fe	71Ga	85Rb	88Sr	137Ba	140Ce	153Eu
		Average	40.1274	112774	311845	21246.7	14.8558	368.264	1190.18	5.69423	15.2434	109.309	33.5557	0.836255	0.954524
		2SD	11.1132	27498.3	62738.2	14100.5	4.20233	69.6903	#DIV/0!	2.25618	11.8043	51.1483	11.4597	0.78602	0.625951
		RSD	27.6948	24.3837	20.1184	66.3657	28.2874	18.924	#DIV/0!	39.6223	77.4384	46.7925	34.1512	93.9929	65.5772
		Max	44.0566	141570	348622	39615.7	16.3416	471.549	1190.18	8.38161	28.8058	164.541	48.8322	1.26998	1.17583
		Min	36.1983	77238.7	196782	9928.12	13.3701	303.925	1190.18	4.04823	7.59447	60.6375	26.1377	0.503766	0.733217
		N	2	23	23	21	2	22	1	22	23	23	23	3	2

## Sheet: Quartz
			23Na	25Mg	27Al	48Ti	57Fe	59Co	63Cu	85Rb	88Sr	90Zr	93Nb	133Cs
11	EC 002 Qz5		10787.9	366.498	19757.5	1863.81	14491.9			45.4814		13.3409		5.25976
12	EC 002 Qz6		9605.15		11775.1	1139.74
13	EC 002 Qz7		8234.63		14598.5	1297.65				64.118	4.7826			100.09
14	EC 002 Qz8		10668.4		11794.3	1120.58
15	EC 002 Qz9		10002.8		14843.5	1607.97				80.0481	5.49141	54.0372	3.95498	29.2915
20	EC 002 Qz14		9387.1		12994.3	1059.03	46073.8	11.0126	92.7656		21.4965
			23Na	25Mg	27Al	48Ti	57Fe	59Co	63Cu	85Rb	88Sr	90Zr	93Nb	133Cs
		Average	9781.01	366.498	14293.9	1348.13	30282.8	11.0126	92.7656	63.2158	10.5902	33.689	3.95498	44.8805
		2SD	1882.12	#DIV/0!	5968.39	641.733	44663.5	#DIV/0!	#DIV/0!	34.602	18.9036	57.5532	#DIV/0!	98.5994
		RSD	19.2426	#DIV/0!	41.7549	47.6017	147.488	#DIV/0!	#DIV/0!	54.7363	178.501	170.837	#DIV/0!	219.693
		Max	10787.9	366.498	19757.5	1863.81	46073.8	11.0126	92.7656	80.0481	21.4965	54.0372	3.95498	100.09
		Min	8234.63	366.498	11775.1	1059.03	14491.9	11.0126	92.7656	45.4814	4.7826	13.3409	3.95498	5.25976
		N	6	1	6	6	2	1	1	3	3	2	1	3
